# Supplementary material for: Kinetics of Resorcinol-Formaldehyde Condensation—Comparison of Common Experimental Techniques
Source: MDPI journal article supplement (doi:10.3390/gels8010008), 2021-12-23
Supplement: s1 [file s1]

Supplementary

# Kinetics of Resorcinol-Formaldehyde Condensation—Comparison of Common Experimental Techniques

Eva Kinnertová \*, Václav Slovák, Roman Maršálek and Martin Mucha

Department of Chemistry, Faculty of Science, University of Ostrava, 30.dubna 22, 70103 Ostrava, Czech Republic; vaclav.slovak@osu.cz (V.S.); roman.marsalek@osu.cz (R.M.); martin.mucha@osu.cz (M.M.)

\* Correspondence: eva.kinnertova@osu.cz

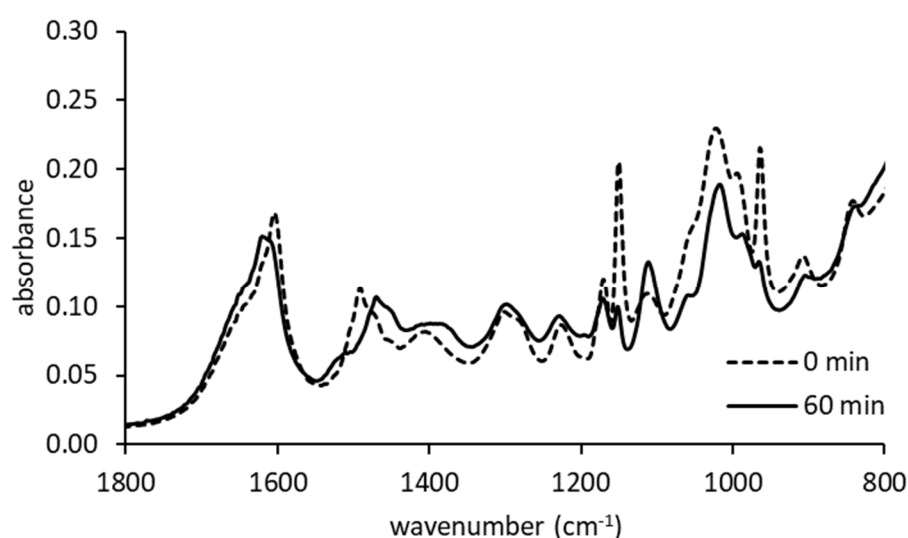

**Figure S1.** FTIR spectra of RC25-40 mixture at the beginning and after 1 h of reaction.

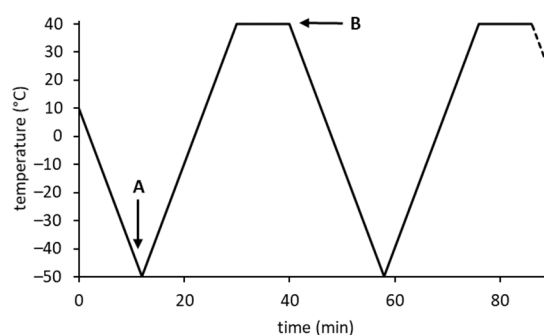

**Figure S2.** Temperature program of DSC measurements. Points A and B indicate the start of recording melting and freezing curves, respectively. Point A is considered the beginning of the reaction (time  $t = 0$ ).
